# Supplementary material for: Role of CXCR3 signaling in response to anti-PD-1 therapy
Source: PubMed Central journal article supplement — eBioMedicine. 2019 Sep 11;48:169–77. doi: 10.1016/j.ebiom.2019.08.067 (PMC6838359; doi:10.1016/j.ebiom.2019.08.067), 2019-09-11

Supplementary Table 1: Demographic characteristics of patients

| Patients (n=43)           |              |
|---------------------------|--------------|
| Age (years)               | 58.9 (34-76) |
| Sex                       |              |
| Men                       | 27 (62.8%)   |
| Women                     | 16 (37.2%)   |
| Types of tumor            |              |
| Melanoma                  | 11 (25.6%)   |
| Rhinopharyngeal neoplasm  | 2 (4.7%)     |
| Esophageal neoplasm       | 3 (7.0%)     |
| lung neoplasm             | 4 (9.3%)     |
| Thymic carcinoma          | 1 (2.3%)     |
| Cardiac cancer            | 1 (2.3%)     |
| Cholangiocarcinoma        | 11 (25.6%)   |
| Gallbladder cancer        | 7 (16.2%)    |
| Colon neoplasm            | 2 (4.7%)     |
| Metastatic adenocarcinoma | 1 (2.3%)     |
| ECOG performance status   |              |
| 0                         | 29 (67.4%)   |
| 1                         | 14 (32.6%)   |
| Previous chemotherapy     |              |
| Platinum                  | 20 (46.5%)   |
| Paclitaxel                | 11 (25.6%)   |
| Dacarbazine               | 5 (11.6%)    |
| Temozolomide              | 1 (2.3%)     |
| Fluorouracil              | 4 (9.3%)     |
| Gemcitabine               | 3 (7.0%)     |
| Raltitrexed               | 2 (4.7%)     |
| Tegafur                   | 6 (14.0%)    |
| Vindesine                 | 1 (2.3%)     |
| Pemetrexed                | 3 (7.0%)     |
| Irinotecan                | 3 (7.0%)     |
| Tumor resection           |              |
| Yes                       | 27 (62.8%)   |
| No                        | 16 (37.2%)   |
| Metastasis                | 43 (100%)    |

Supplementary Table 2: Mass cytometry antibody panel information.

| Metal     | Target           | Clone      |
|-----------|------------------|------------|
| 151Eu     | CD2              | TS1/8      |
| 143Nd     | CD5              | UCHT2      |
| 147Sm     | CD7              | CD7-6B7    |
| 171Yb     | CD9              | SN4 C3-3A2 |
| 160Gd     | CD28             | CD28.2     |
| 141Pr     | CD49d            | 9F10       |
| 164Dy     | CD161            | HP-3G10    |
| 158Gd     | CCR4             | 205410     |
| 144Nd     | CCR5             | NP-6G4     |
| 156Gd     | CXCR3            | G025H7     |
| 142Nd     | CD11a            | HI111      |
| 145Nd     | CD4              | RPA-T4     |
| 146Nd     | CD8a             | RPA-T8     |
| 148Nd     | CD16             | 3G8        |
| 149Sm     | CD25             | 2A3        |
| 154Sm     | CD45             | HI30       |
| 159Tb     | CCR7             | G043H7     |
| 162Dy     | CD69             | FN50       |
| 165Ho     | CD45RO           | CD45RO     |
| 166Er     | CD44             | BJ18       |
| 167Er     | CD27             | O323       |
| 169Tm     | CD45RA           | HI100      |
| 170Er     | CD3              | UCHT1      |
| 172Yb     | CD57             | HCD57      |
| 174Yb     | HLA-DR           | L243       |
| 176Yb     | CD127            | A019D5     |
| 150Nd     | CD134 (OX40)     | ACT35      |
| 152Sm     | CD95 (Fas)       | DX2        |
| 153Eu     | CD366 (Tim-3)    | F38-2E2    |
| 155Gd     | CD279 (PD-1)     | EH12.2H7   |
| 161Dy     | CD152 (CTLA-4)   | 14D3       |
| 168Er     | CD278 (ICOS)     | C398.4A    |
| 173Yb     | CD137 (4-1BB)    | 4B4-1      |
| 175Lu     | CD223 (LAG3)     | 11C3C65    |
|           | Live/dead marker |            |
| 194/195Pt | Cisplatin        |            |

**Supplementary Figures Legends:**

**Supplementary Figure 1.** Dynamic changes of the percentages of other sixteen cell populations in two melanoma patients are presented by a line diagram before and after anti-PD-1 therapy.

**Supplementary Figure 2.** The experimental information of patient samples, including patient ID, tumor type, response to anti-PD-1 treatment and collection points.

**Supplementary Figure 3.** (a) The expression of serum CXCL9 in response patients and non-response patients was tested by ELISA. (b) The expression of serum CXCL10 in response patients and non-response patients was tested by ELISA. (mean  $\pm$  s.e.m.), \* $P < 0.05$  by Student's t-tests.

**Supplementary Figure 4.** The mRNA expressions of CXCL9/10 in the tumor tissues of mice model were detected by QPCR. (mean  $\pm$  s.e.m.;  $n = 4$ ). \*\*\* $P < 0.001$  and \*\*\*\* $P < 0.0001$  by Student's t-tests.

**Supplementary Figure 5.** Tumor volumes in the treatment and control groups (6 mice in each group) were observed for 21 days and presented in a line chart. (mean  $\pm$  s.e.m.), \* $P < 0.05$ , NS non-significant by Student's t-tests, comparisons between indicated groups on day 21.

Supplementary Figure 1

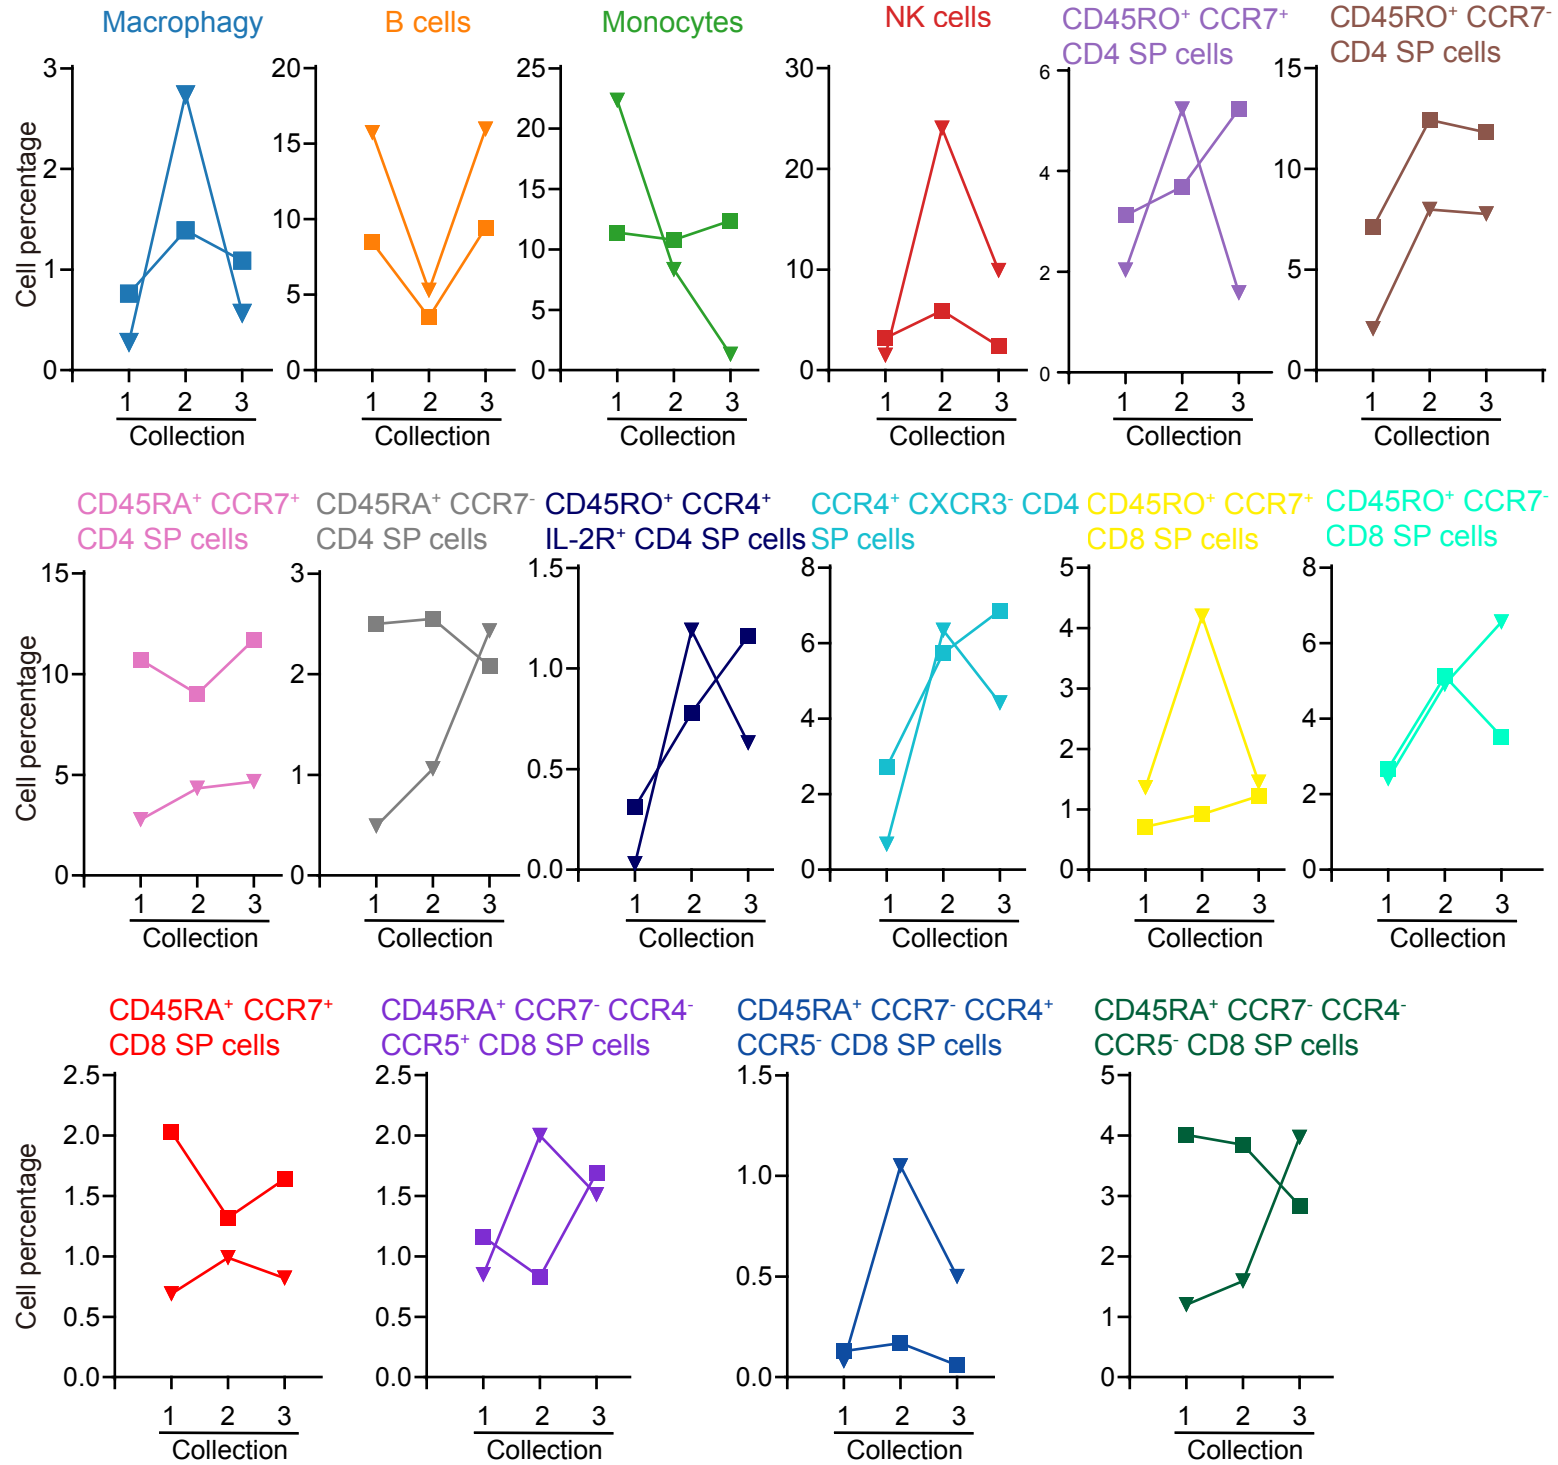

Supplementary Figure 2

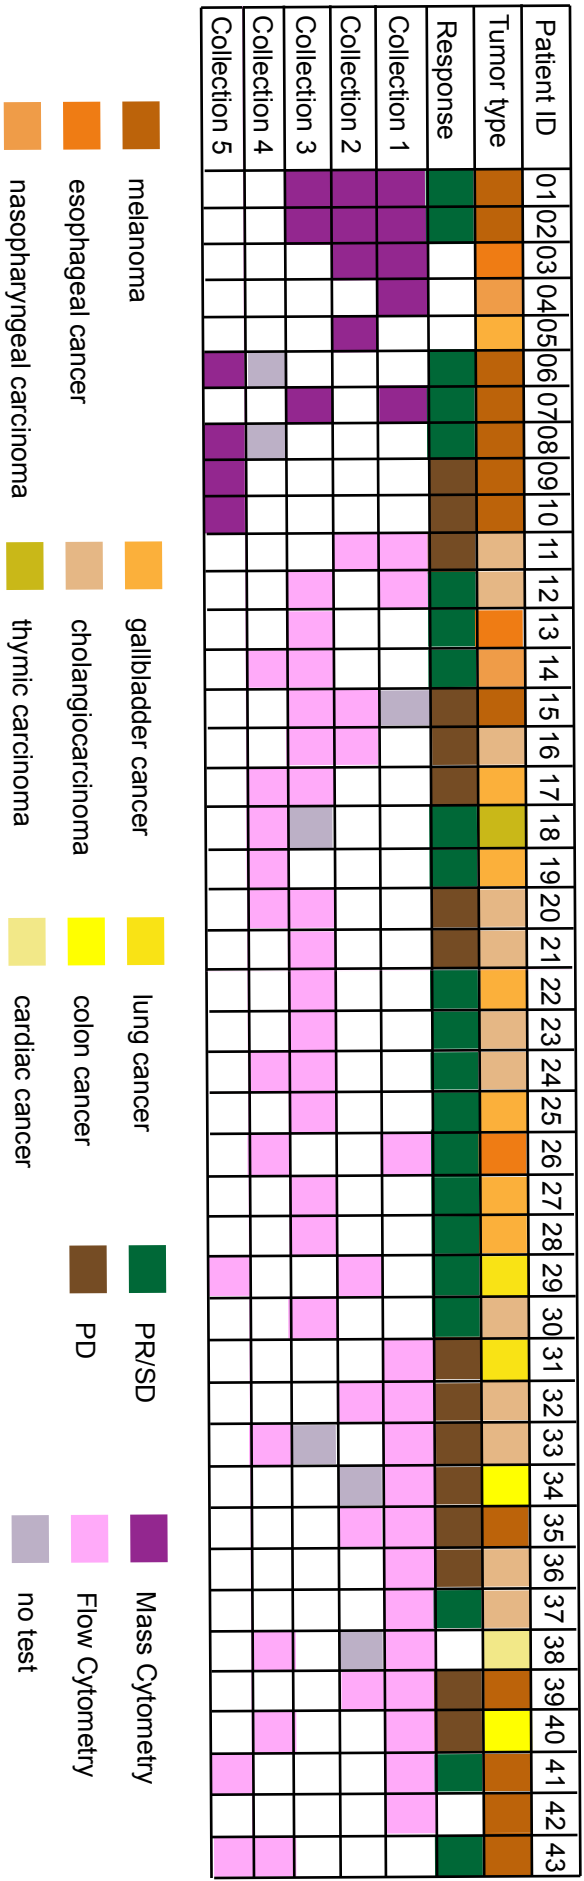

Supplementary Figure 3

a

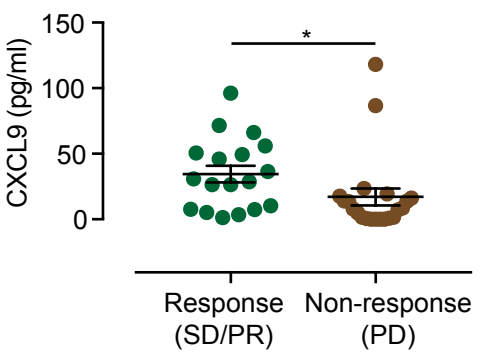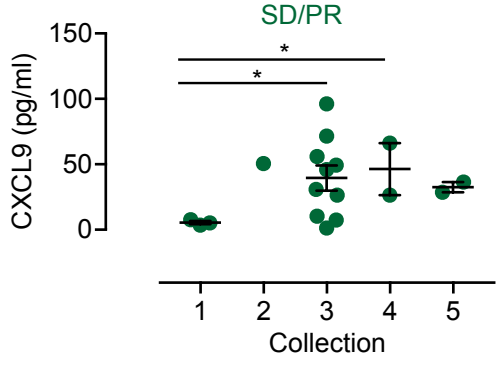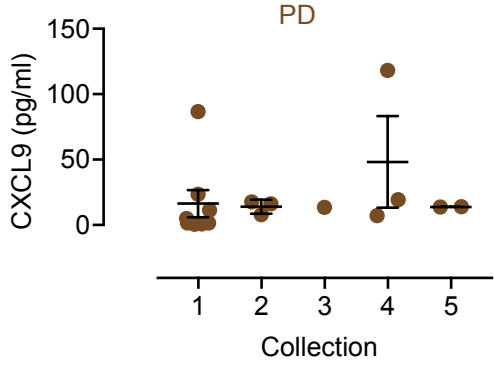

b

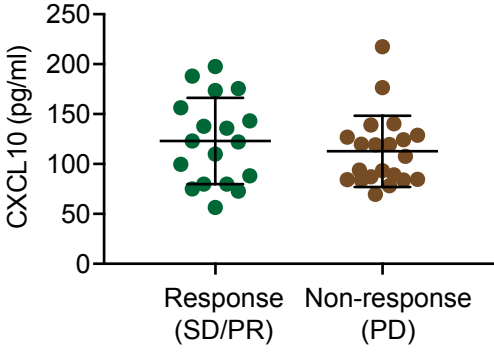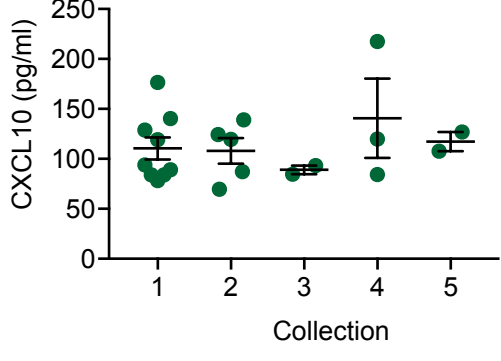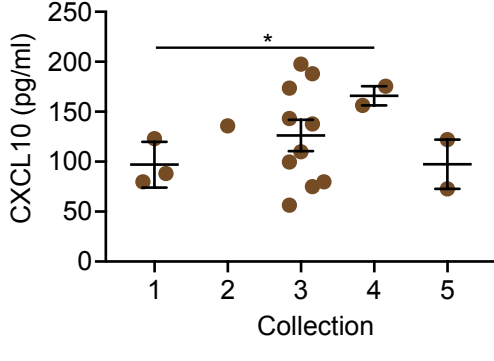

Supplementary Figure 4

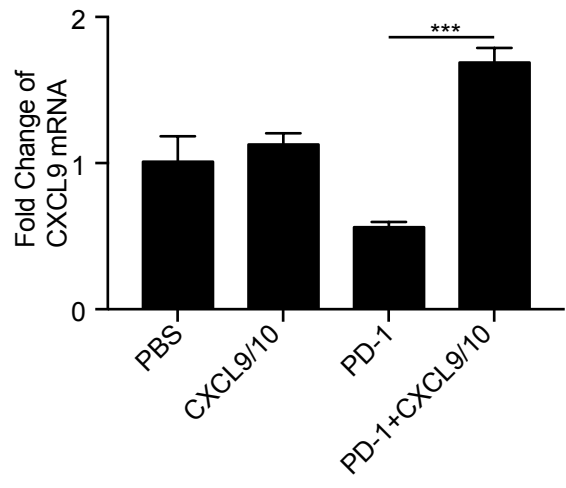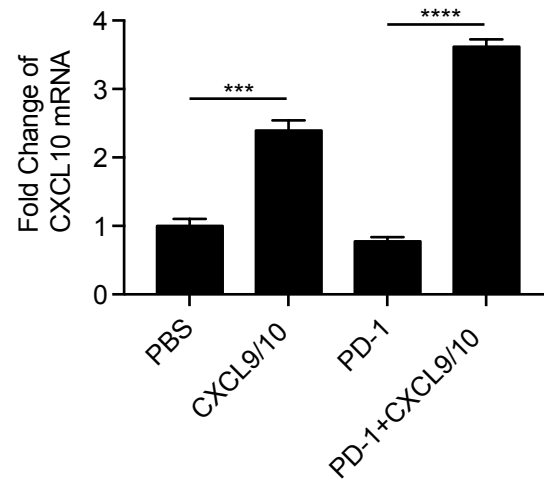

Supplementary Figure 5

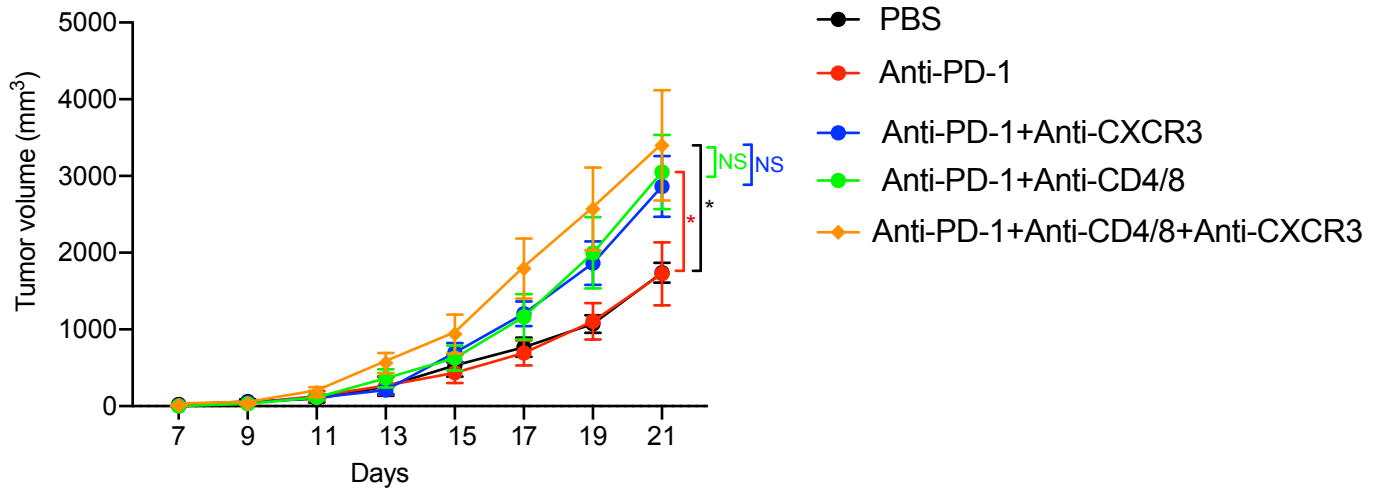

Supplement: mmc1.pdf [file mmc1.pdf]
